# Supplementary material for: Genetic Diversity and Population Structure of Jubaea chilensis, an Endemic and Monotype Gender from Chile, Based on SNP Markers
Source: MDPI journal article supplement (doi:10.3390/plants11151959), 2022-07-28
Supplement: s1 [file s1]

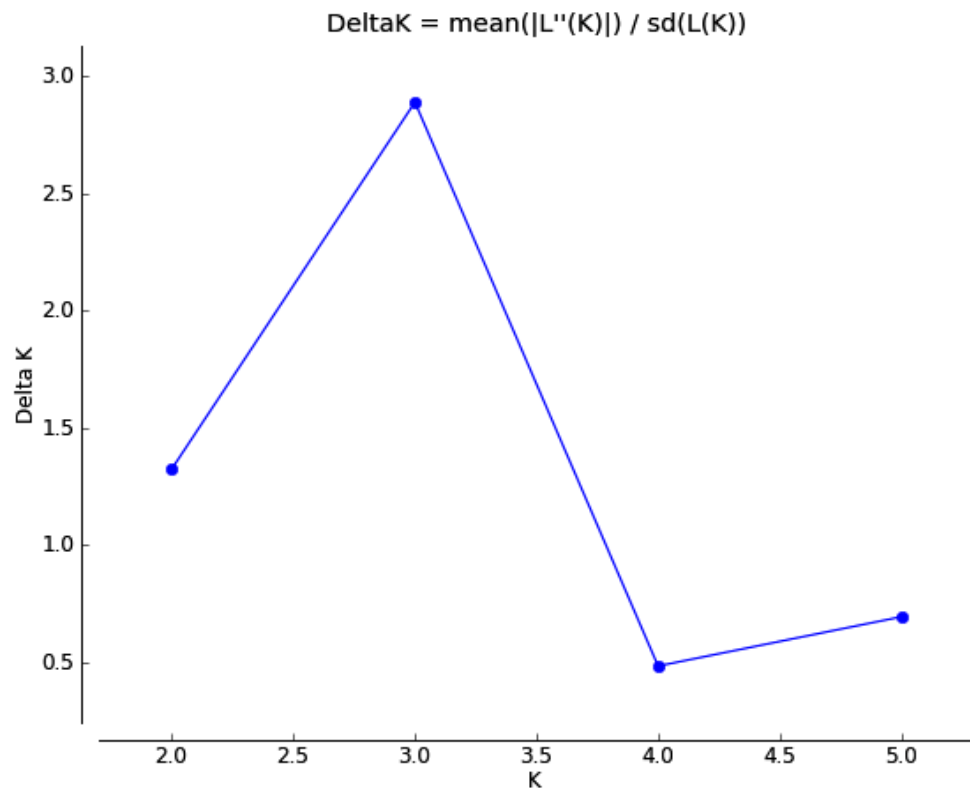

**Figure S1.**  $\Delta K$  values for different numbers of populations assumed ( $K$ ) in the STRUCTURE HARVESTER analysis v 0.6.94 for the six population groups of *Jubaea chilensis*, central Chile.

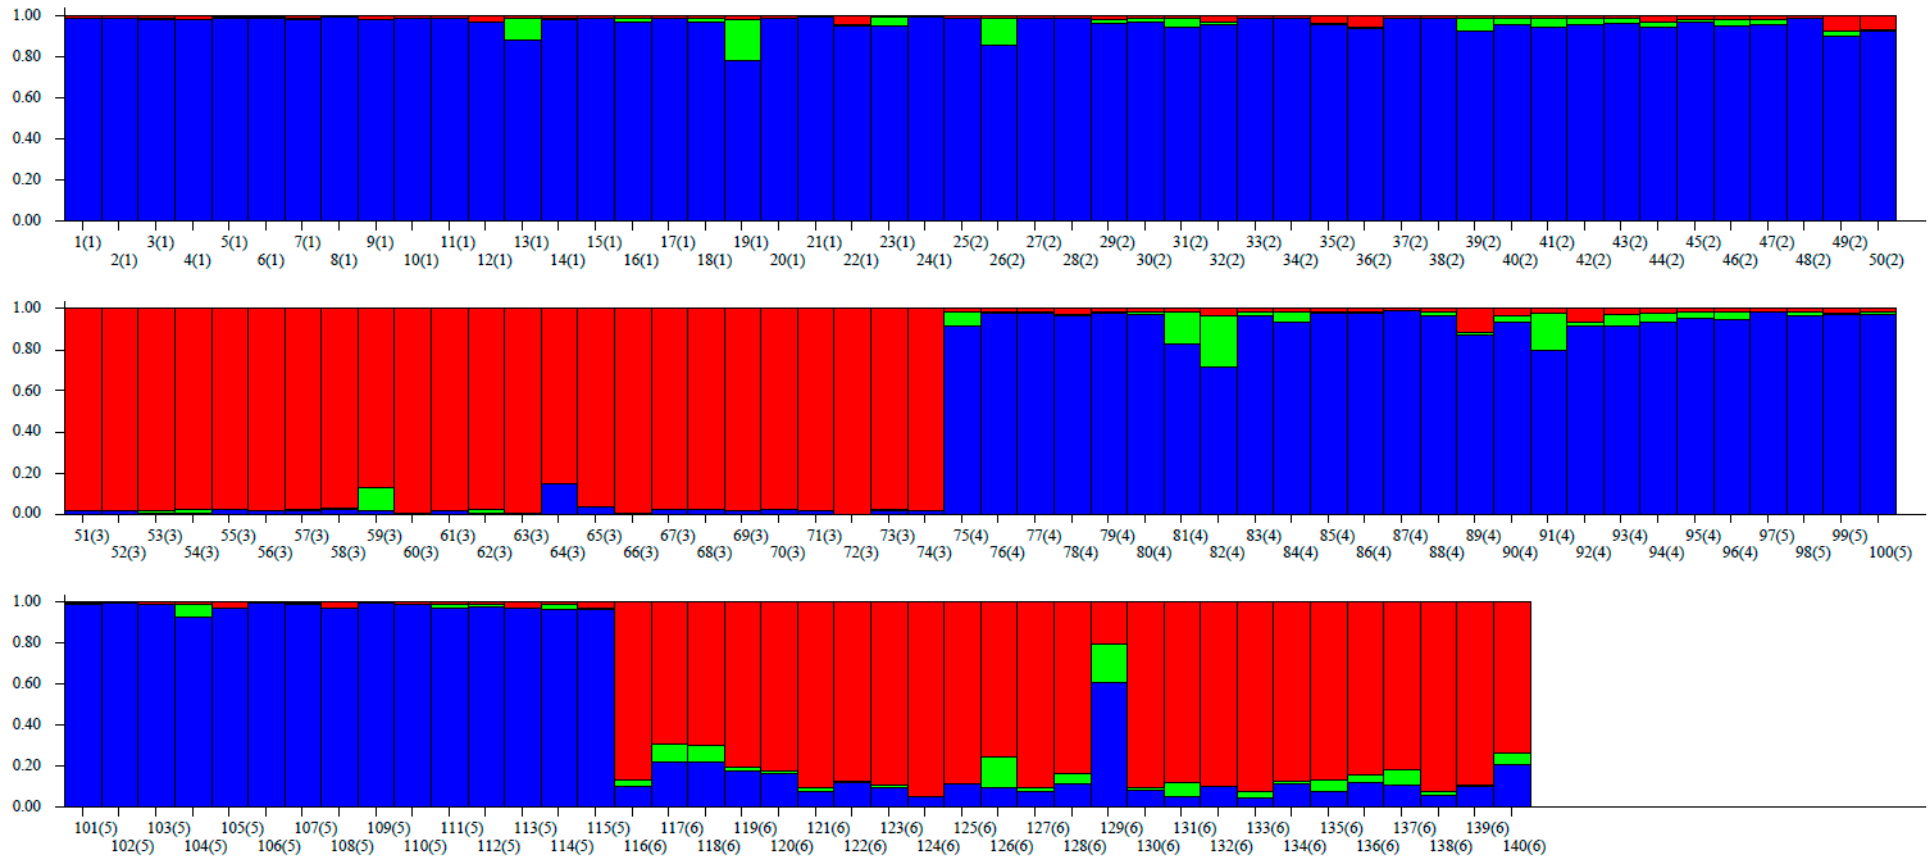

**Figure S2.** Populational structure inferred for the six sampled groups of *Jubaia chilensis*, central Chile, based on the analysis of 1,038 SNPs using the STRUCTURE v 2.3.4, assuming the Admixture model. Each individual is represented by a vertical bar, often partitioned into colored segments with the length of each segment representing the proportion of the individual's genome from  $K = 3$  ancestral populations. Cocalan:1-24, Culimo:25-50, Viña del Mar/Valparaíso:51-74, Candelaria:75-96, Petorca:97-115, and Ocoa:116-140.

**Table S1.** Frequency of SNPs by minor allele frequencies (MAF) within the six population groups of *Jubaea chilensis*. (CUL) Culimo, (PET) Petorca, (OCO) Ocoa, (VAV) Viña del Mar/Valparaíso, (COC) Cocalán, (CAN) Candelaria.

|                                           | CUL   | PET   | OCO   | VAV   | COC   | CAN   |
|-------------------------------------------|-------|-------|-------|-------|-------|-------|
| <b>MAF <math>\leq</math> 0.1</b>          | 0.994 | 0.973 | 0.976 | 0.969 | 0.988 | 0.989 |
| <b>0.1 &lt; MAF <math>\leq</math> 0.2</b> | 0.006 | 0.017 | 0.022 | 0.022 | 0.01  | 0.01  |
| <b>0.2 &lt; MAF <math>\leq</math> 0.3</b> | 0     | 0.007 | 0.002 | 0.007 | 0.001 | 0     |
| <b>0.3 &lt; MAF <math>\leq</math> 0.4</b> | 0     | 0.003 | 0     | 0.002 | 0.001 | 0.001 |
| <b>0.4 &lt; MAF <math>\leq</math> 0.5</b> | 0     | 0     | 0     | 0     | 0     | 0     |

**Table S2.** Log likelihood and Bayesian deviance for BA3-SNPs runs.

| Runs      | Log likelihood | Deviance |
|-----------|----------------|----------|
| <b>1</b>  | -17655.7066    | 35311.41 |
| <b>2</b>  | -17225.1847    | 34450.37 |
| <b>3</b>  | -16909.3281    | 33818.66 |
| <b>4</b>  | -17435.152     | 34870.3  |
| <b>5</b>  | -17336.3691    | 34672.74 |
| <b>6</b>  | -17735.9297    | 35471.86 |
| <b>7</b>  | -17306.2556    | 34612.51 |
| <b>8</b>  | -17099.8056    | 34199.61 |
| <b>9</b>  | -17324.9496    | 34649.9  |
| <b>10</b> | -17342.0692    | 34684.14 |

**Table S3.** Evanno method results (Evanno et al., 2005) obtained using the STRUCTURE HARVESTER v 0.6.94 for the six population groups of *Jubaea chilensis*, central Chile. The highest value of delta K (in bold) indicates the number of established groups.

| K        | Reps      | Mean LnP (K)      | Stdev LnP (K)  | Ln' (K)        | Ln'' (K)        | Delta K      |
|----------|-----------|-------------------|----------------|----------------|-----------------|--------------|
| 1        | 25        | -17626.820        | 1.210          | -              | -               | -            |
| 2        | 25        | -16739.548        | 277.545        | 887.272        | 367.980         | 1.326        |
| <b>3</b> | <b>25</b> | <b>-16220.256</b> | <b>515.248</b> | <b>519.292</b> | <b>1488.932</b> | <b>2.890</b> |
| 4        | 25        | -17189.896        | 2541.272       | -969.640       | 1232.916        | 0.485        |
| 5        | 25        | -16926.620        | 3753.075       | 263.276        | 2608.900        | 0.695        |
| 6        | 25        | -14054.444        | 874.565        | 2872.176       | -               | -            |
